# Supplementary material
Source: Springer Nature journal article supplement (https://www.springermedizin.de/resource/supplementary/13051_2010_119_MOESM2_ESM.pdf/9669976)

DNA and RNA bases dominate this region along with the O-P-O backbone

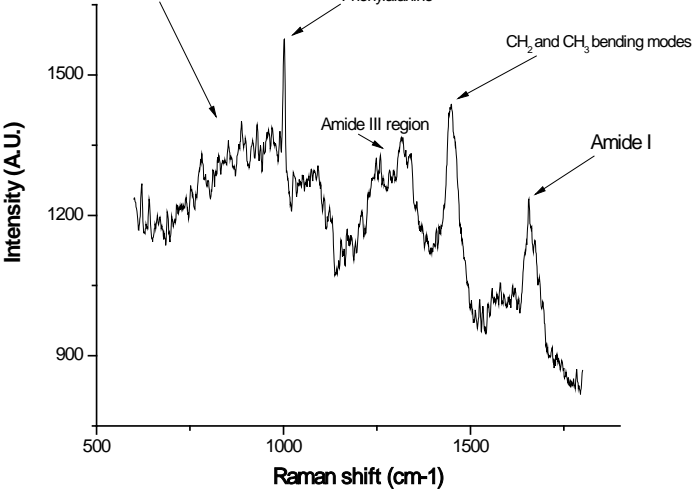

Supplement: MOESM2 [file 9669976]
